# Supplementary material for: Synthesis and luminescence properties of a series of tris(4-styrylphenyl)phosphorus-(iii) and -(v) compounds and of a [Cu(PR3)4]BF4 complexElectronic supplementary information (ESI) available: 1H, 13C and 31P NMR spectra. See http://www.rsc.org/suppdata/dt/b3/b309735h/
Source: Royal Society of Chemistry journal article supplement (doi:10.1039/b309735h), 2003-01-01

# Electronic Supplementary Information

## Dalton Transactions

“Synthesis and Luminescence Properties of a series of *tris*-(4-styrylphenyl) Phosphorus  
(III) and (V) Compounds and of a [Cu(PR<sub>3</sub>)<sub>4</sub>]BF<sub>4</sub> Complex”

by Rhett C. Smith and John D. Protasiewicz\*

Table of Contents for Spectra:

**S2.** Cl<sub>2</sub>PTbs<sub>3</sub> <sup>31</sup>P NMR Spectrum (CDCl<sub>3</sub>).

**S3.** Cl<sub>2</sub>PTbs<sub>3</sub> <sup>1</sup>H NMR Spectrum (CDCl<sub>3</sub>).

**S4.** MePTbs<sub>3</sub>I <sup>31</sup>P NMR Spectrum (CDCl<sub>3</sub>).

**S5.** MePTbs<sub>3</sub>I <sup>1</sup>H NMR Spectrum (CDCl<sub>3</sub>).

**S6.** [Cu(PTbs<sub>3</sub>)<sub>4</sub>]BF<sub>4</sub> <sup>31</sup>P NMR Spectrum (CDCl<sub>3</sub>).

**S7.** [Cu(PTbs<sub>3</sub>)<sub>4</sub>]BF<sub>4</sub> <sup>1</sup>H NMR Spectrum (CDCl<sub>3</sub>).

**S8.** [Cu(PTbs<sub>3</sub>)<sub>4</sub>]BF<sub>4</sub> <sup>13</sup>C NMR Spectrum (full) (CDCl<sub>3</sub>).

**S9.** [Cu(PTbs<sub>3</sub>)<sub>4</sub>]BF<sub>4</sub> <sup>13</sup>C NMR Spectrum (inset of aromatic region) (CDCl<sub>3</sub>).

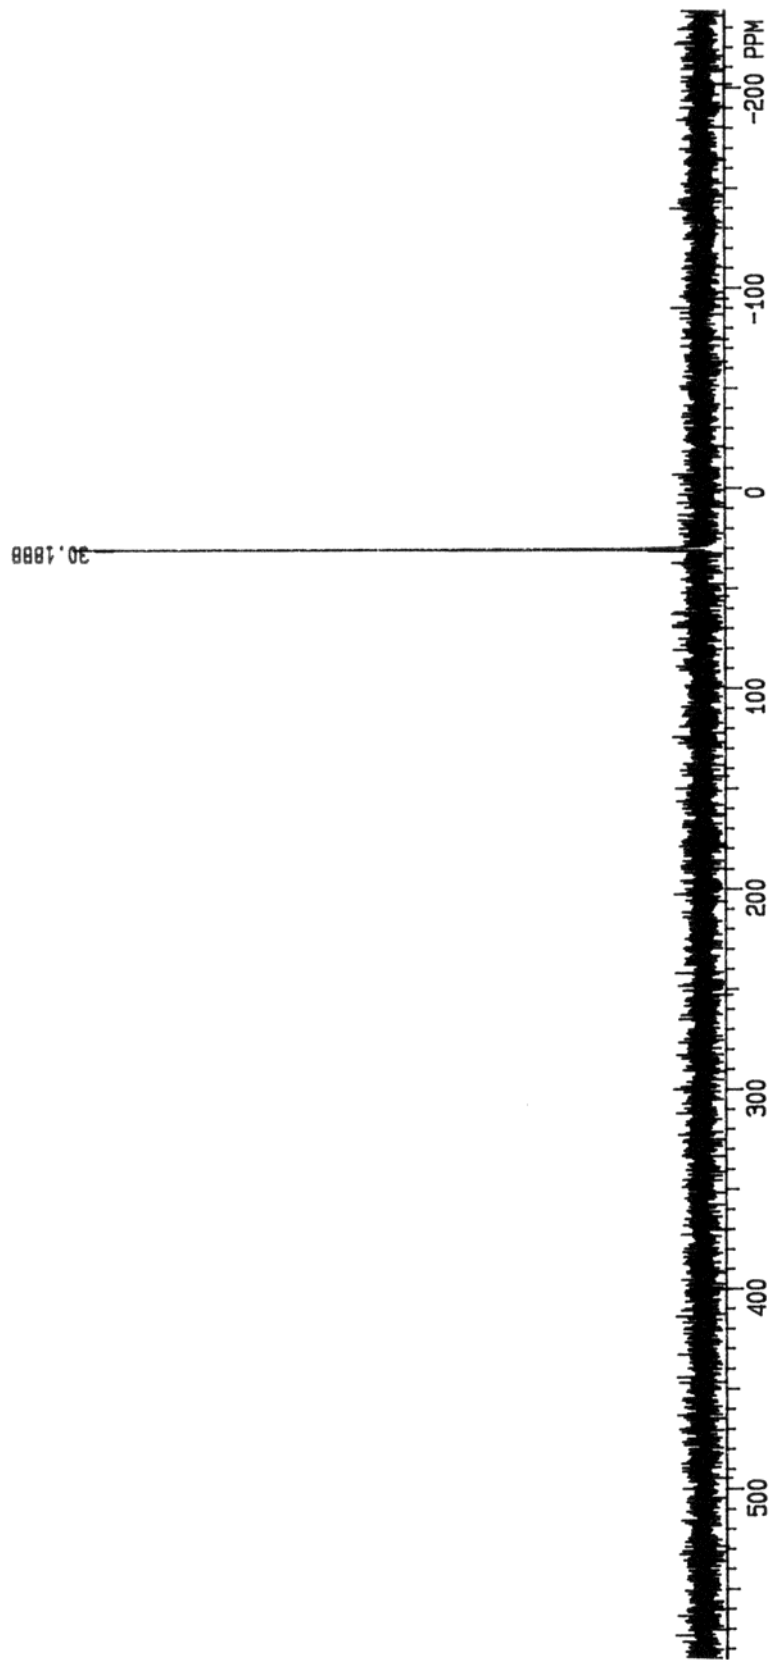

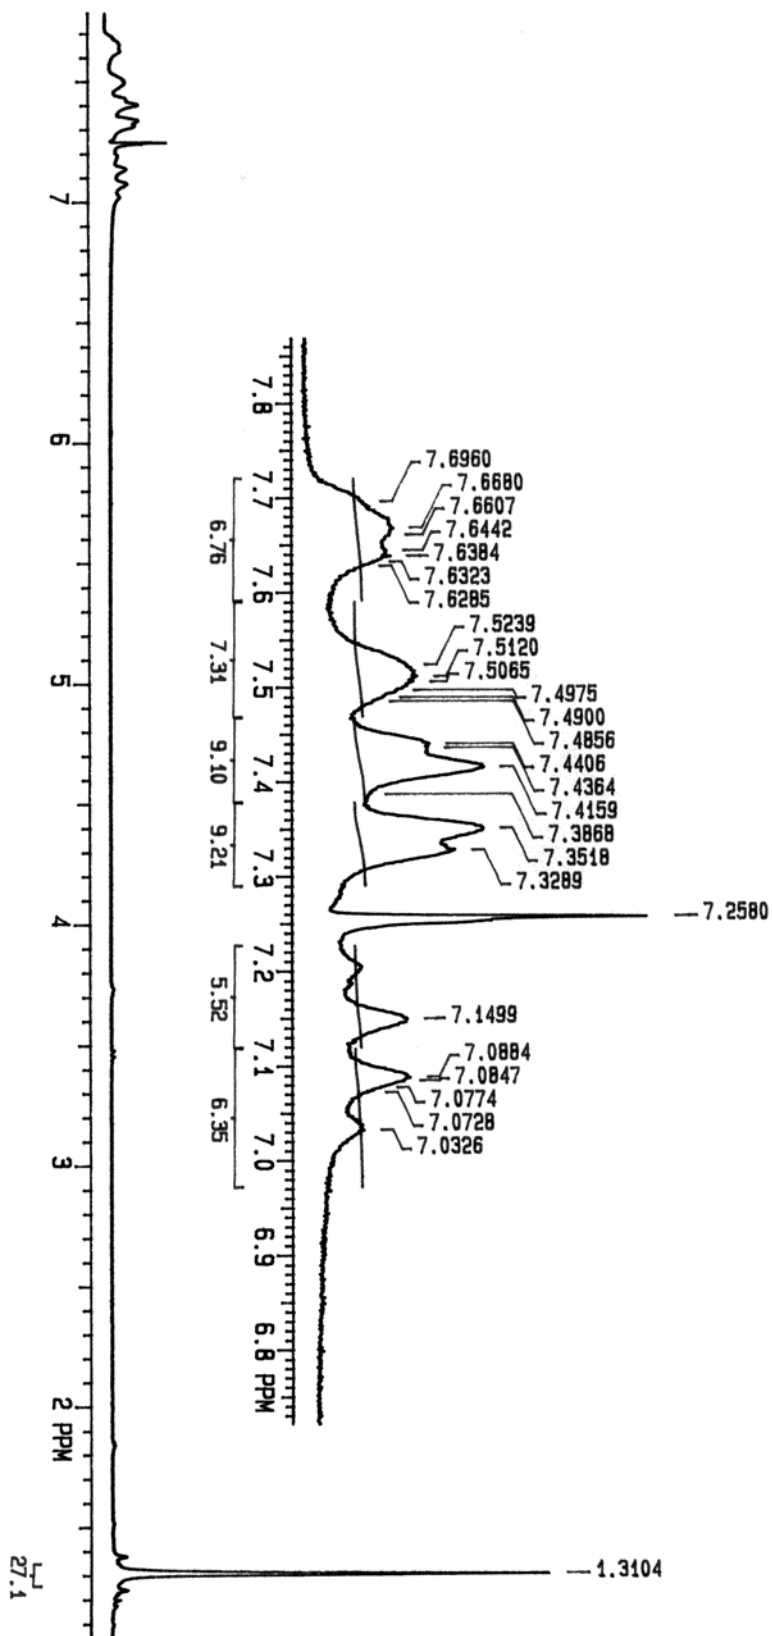

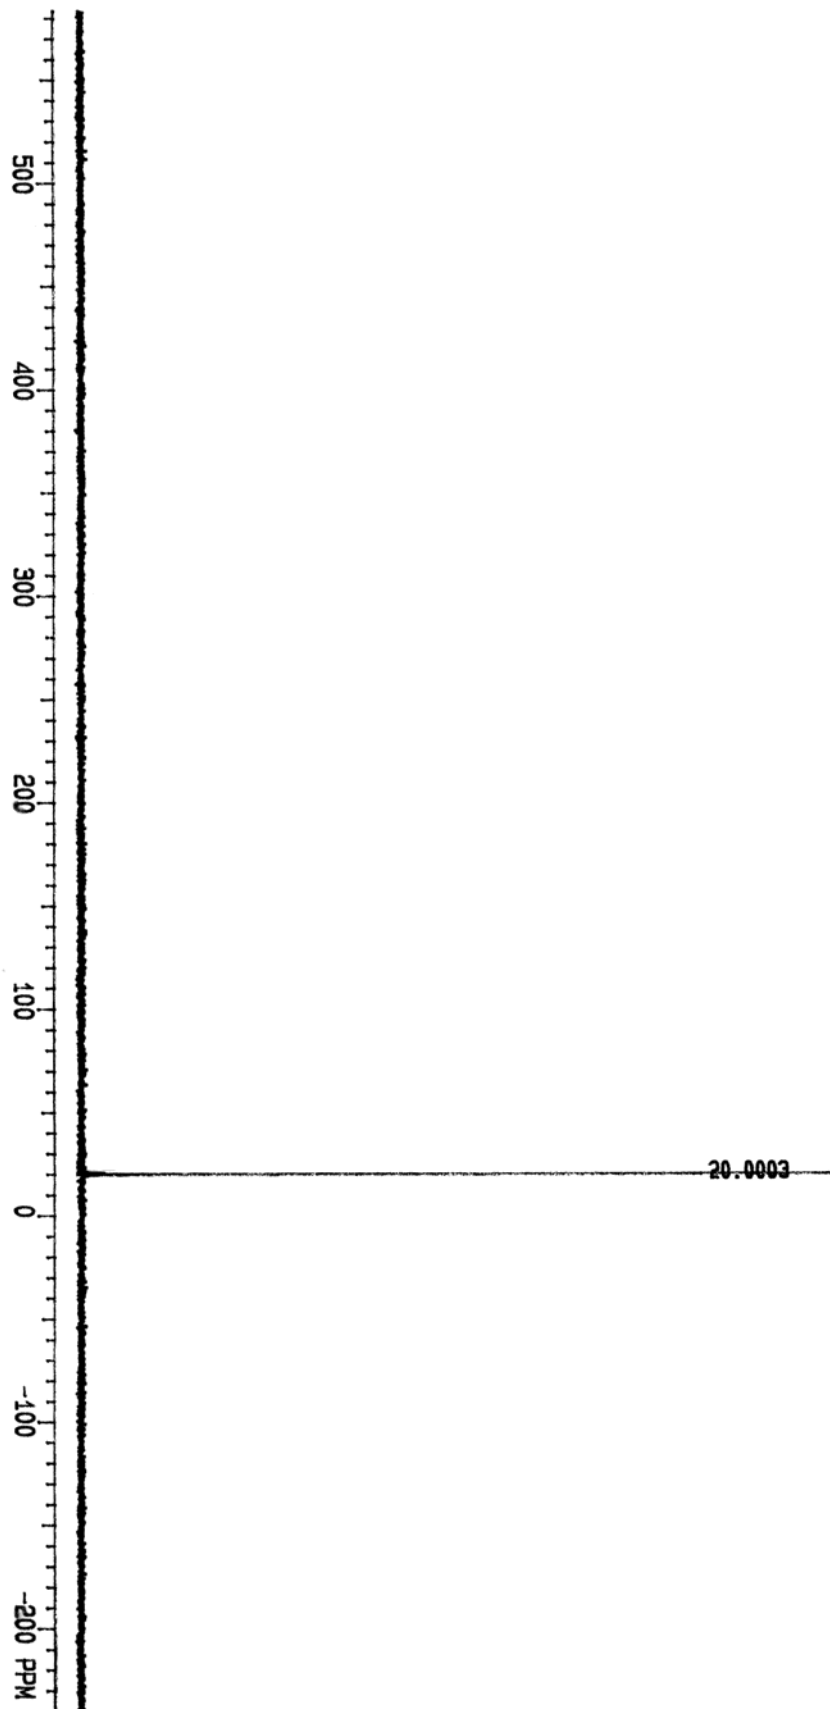

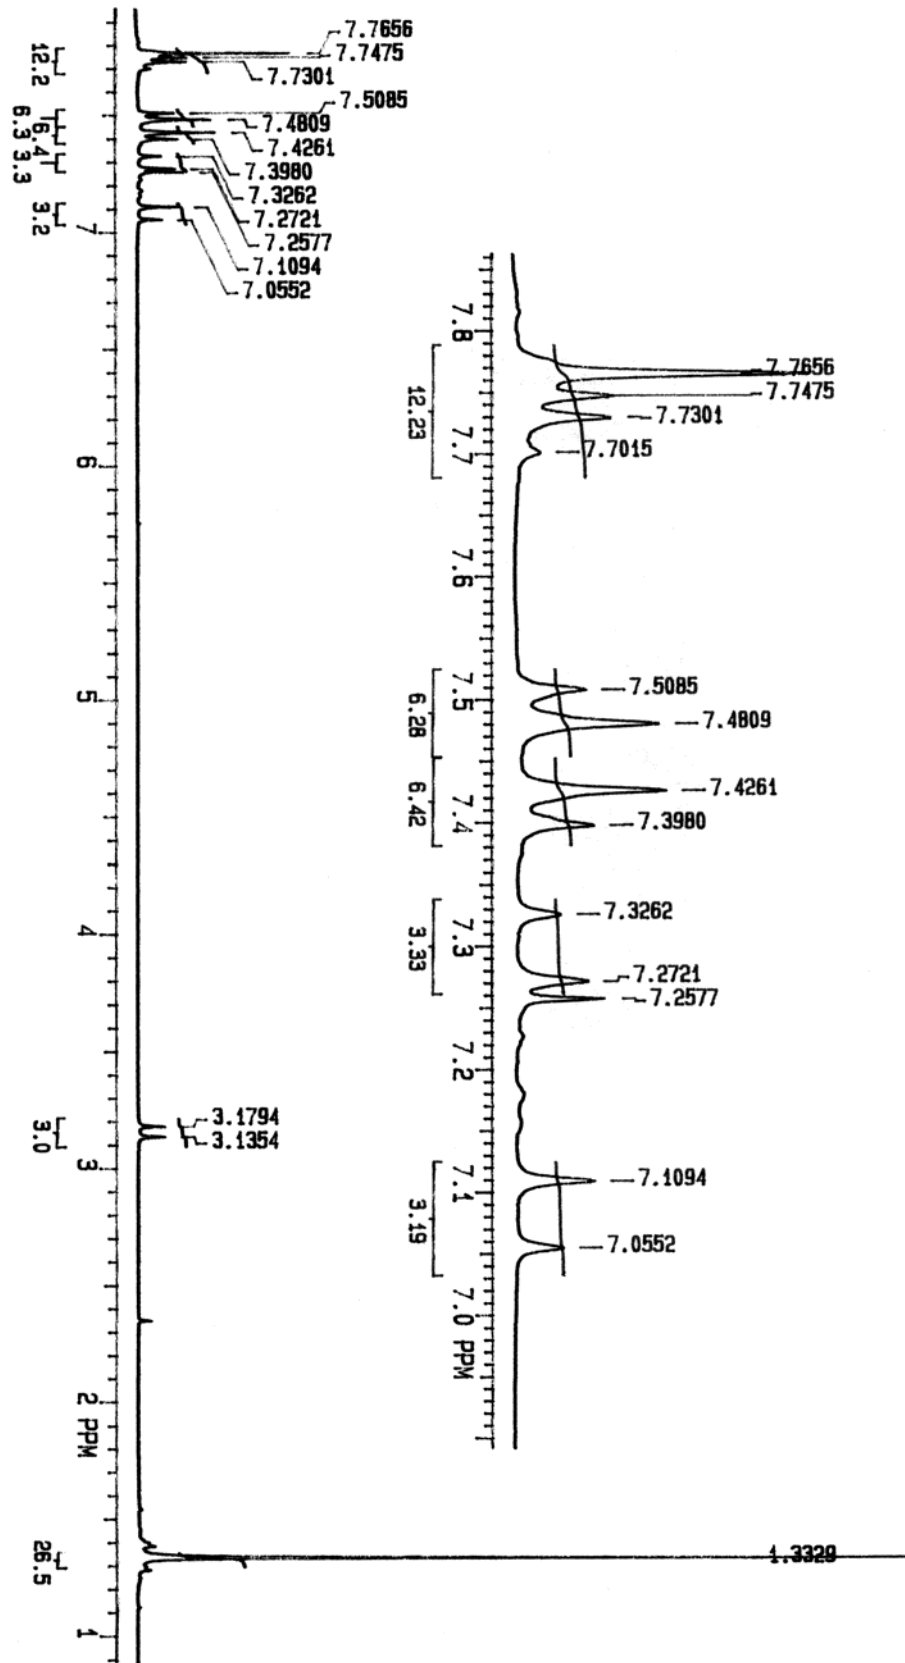

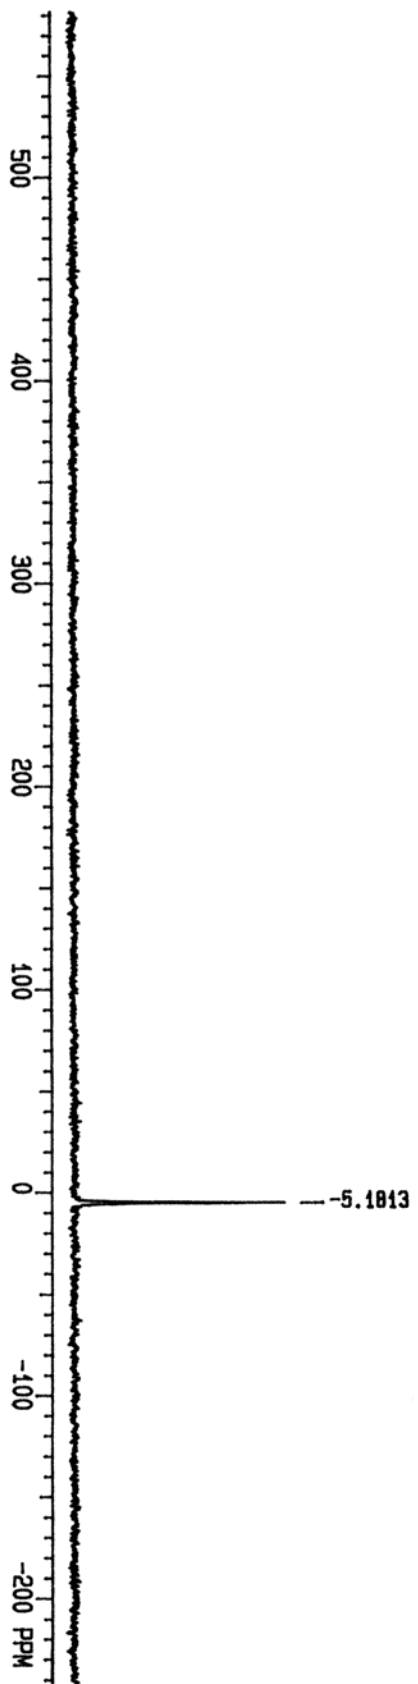

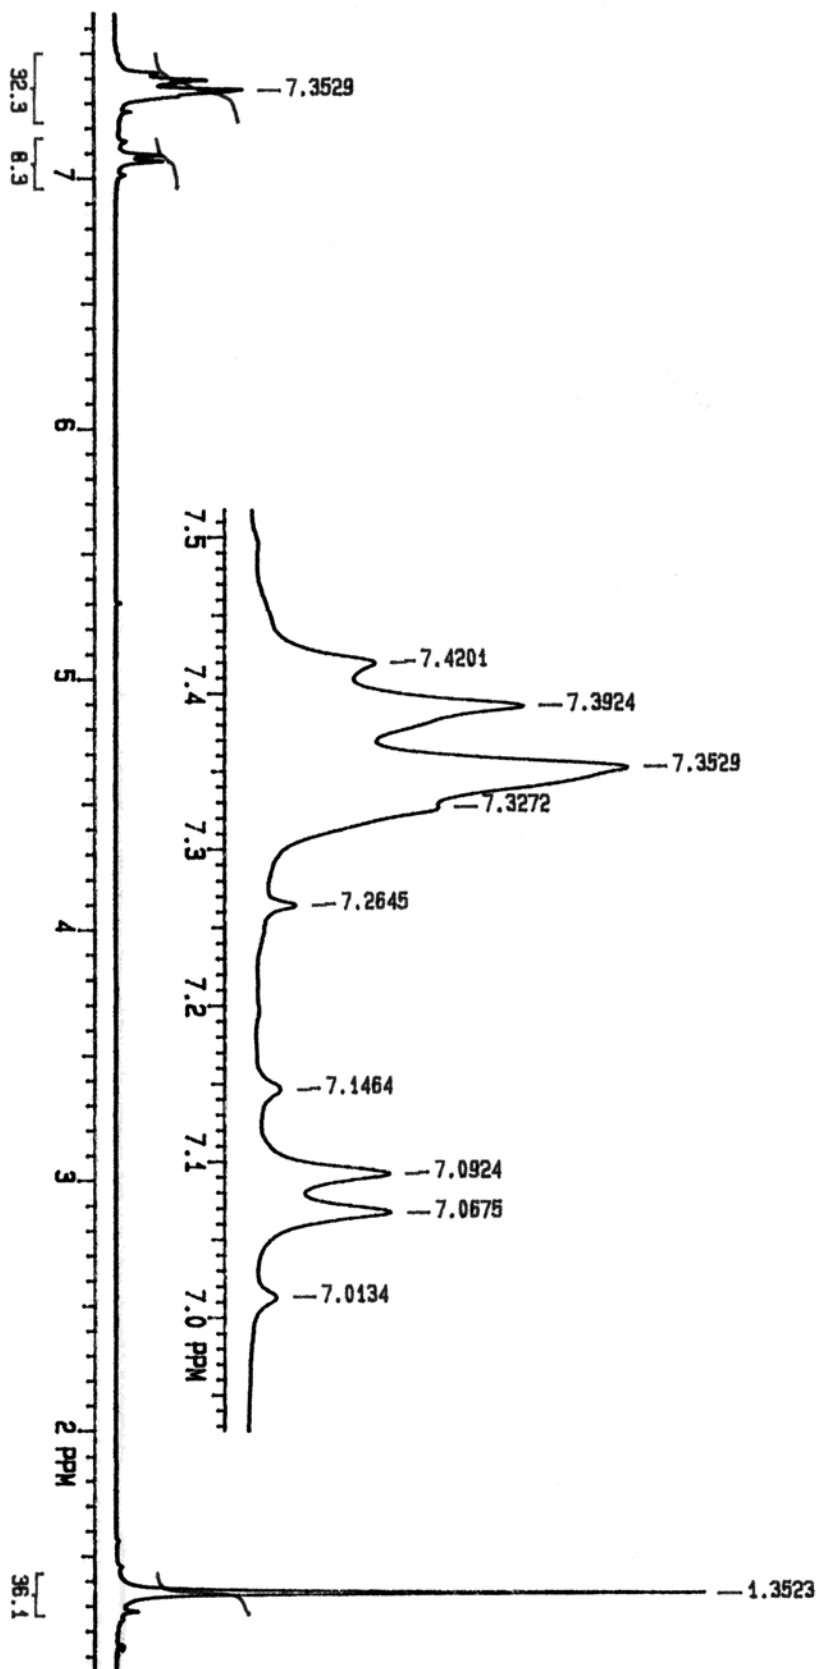

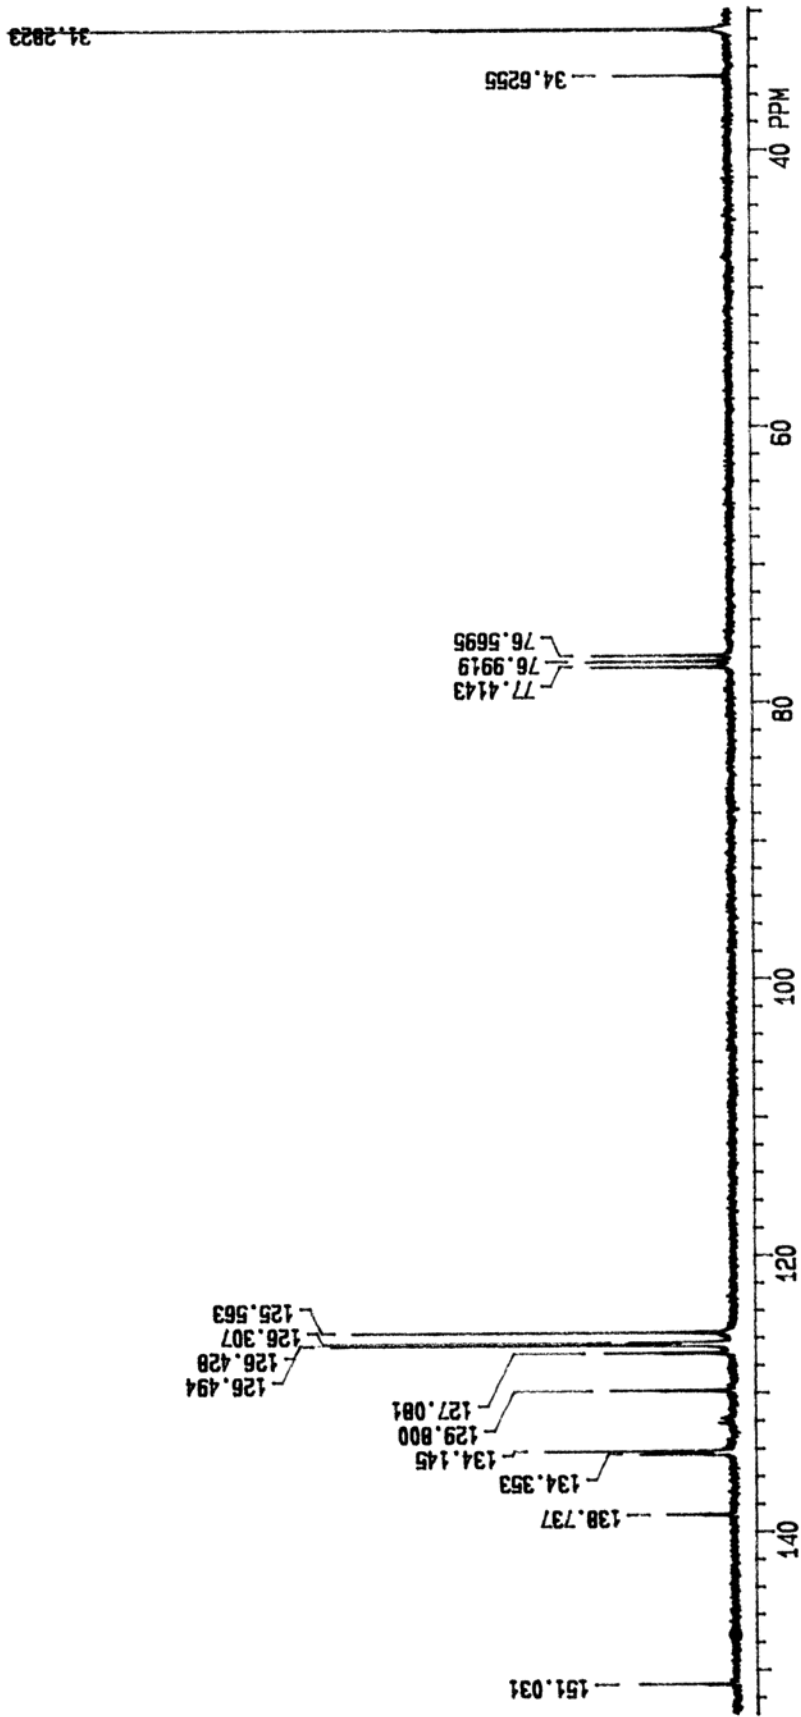



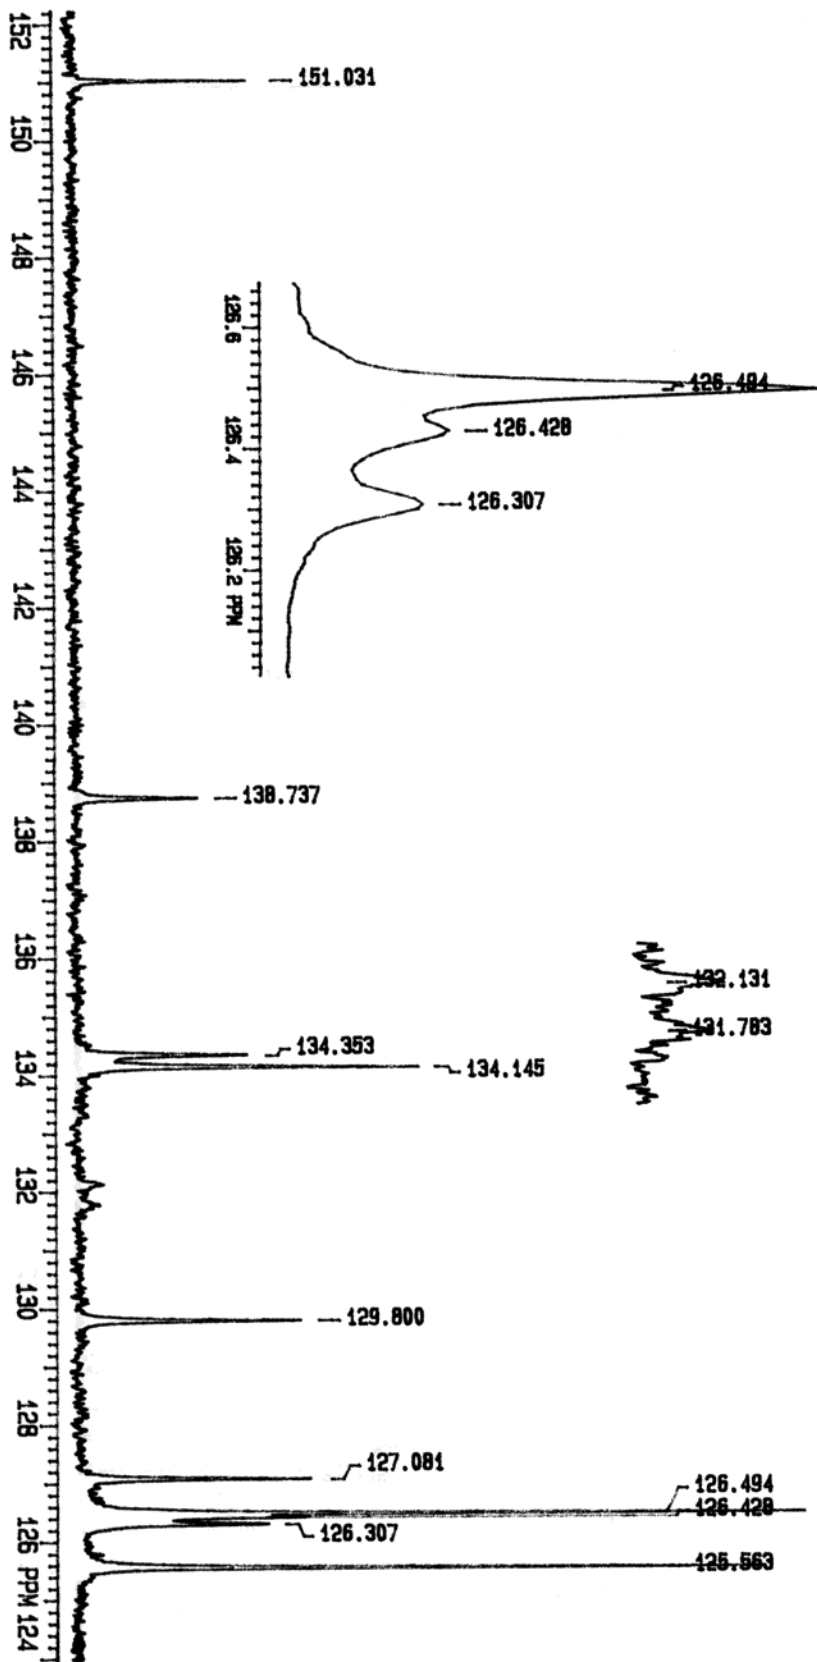

Supplement: b309735h.pdf [file b309735h.pdf]
